# Supplementary material for: Telomere Length and Lung Cancer Mortality among Heavy Smokers
Source: Oxford University Press journal article supplement (doi:10.1158/1055-9965.epi-17-1183), 2018-05-09
Supplement: 10559965epi171183-sup-194256_2_supp_4692387_p7758n.xlsx [file 10559965epi171183-sup-194256_2_supp_4692387_p7758n.xlsx]

## Sheet: Suppl Table S5
Supplementary Table S5. Chromosome 13q telomere length and lung cancer specific-mortality among lung cancer cases by histotype.a
	Allb				Adenocarcinoma				Squamous cell				Small cell
	Deaths	Total	HR	(95% CI)	Deaths	Total	HR	(95% CI)	Deaths	Total	HR	(95% CI)	Deaths	Total	HR	(95% CI)
Tertile TL
1 (shortest)	208	253	1.07	(0.88-1.30)	42	57	0.91	(0.59-1.41)	36	49	1.03	(0.62-1.71)	45	47	1.08	(0.68-1.73)
2	200	260	0.93	(0.77-1.14)	50	63	0.96	(0.62-1.47)	38	50	0.88	(0.53-1.44)	31	36	1.01	(0.59-1.73)
3 (longest)	207	252	1.00	(Ref.)	54	65	1.00	(Ref.)	36	46	1.00	(Ref.)	35	37	1.00	(Ref.)
P-trend	0.515				0.674				0.886				0.737
Quintile TL
1 (shortest)	128	153	1.08	(0.84-1.39)	27	37	0.80	(0.47-1.36)	22	28	1.02	(0.53-1.96)	31	32	1.14	(0.62-2.10)
2	121	156	0.93	(0.72-1.20)	29	36	0.75	(0.44-1.27)	23	33	0.70	(0.36-1.36)	18	19	1.37	(0.70-2.69)
3	119	151	1.08	(0.84-1.40)	28	36	1.01	(0.60-1.72)	19	23	1.13	(0.59-2.18)	16	21	0.75	(0.35-1.60)
4	124	152	0.94	(0.73-1.21)	26	32	0.76	(0.45-1.27)	25	36	0.67	(0.36-1.26)	26	26	1.24	(0.66-2.32)
5 (longest)	123	153	1.00	(Ref.)	36	44	1.00	(Ref.)	21	25	1.00	(Ref.)	20	22	1.00	(Ref.)
P-trend	0.62				0.414				0.789				0.696
Decile TL
1 (shortest)	69	77	1.33	(0.93-1.90)	15	18	1.02	(0.47-2.21)	16	19	1.24	(0.52-2.94)	15	15	1.41	(0.61-3.24)
2	59	76	1.03	(0.71-1.49)	12	19	0.56	(0.24-1.30)	6	9	0.78	(0.26-2.30)	16	17	1.19	(0.54-2.61)
3	65	77	1.25	(0.87-1.80)	13	16	0.97	(0.43-2.20)	11	15	0.90	(0.34-2.38)	10	11	1.24	(0.51-3.01)
4	56	79	0.83	(0.57-1.21)	16	20	0.56	(0.25-1.23)	12	18	0.64	(0.26-1.62)	8	8	2.15	(0.84-5.46)
5	58	74	1.03	(0.71-1.49)	14	19	0.78	(0.35-1.77)	9	12	0.78	(0.30-2.05)	7	8	0.79	(0.29-2.11)
6	61	77	1.38	(0.95-1.99)	14	17	1.24	(0.54-2.84)	10	11	2.23	(0.88-5.68)	9	13	0.93	(0.33-2.61)
7	57	77	0.87	(0.60-1.27)	10	14	0.69	(0.29-1.65)	14	23	0.51	(0.21-1.24)	13	13	1.50	(0.65-3.44)
8	67	75	1.21	(0.85-1.73)	16	18	0.74	(0.34-1.61)	11	13	1.29	(0.49-3.39)	13	13	1.28	(0.54-3.03)
9	67	77	1.19	(0.83-1.70)	23	26	0.92	(0.45-1.88)	12	14	1.15	(0.46-2.84)	7	7	1.43	(0.54-3.78)
10 (longest)	56	76	1.00	(Ref.)	13	18	1.00	(Ref.)	9	11	1.00	(Ref.)	13	15	1.00	(Ref.)
P-trend	0.548				0.506				0.902				0.687
Abbreviations: HR = hazard ratio; CI = confidence interval; TL = telomere length.
aCox proportional hazards models adjusted for age at blood draw, sex, race, asbestos exposure, enrollment year, smoking status at blood draw, intervention arm, and pack years at blood draw.
bThe "All" category includes adenocarcinoma, squamous cell, and small cell, as well as 315 cases for whom histotype was NSCLC, NOS; other NSCLC; unknown or missing.
